# Supplementary material
Source: ML conference proceedings conference paper supplement (https://openreview.net/forum?id=YJHXfcTDaqw)
Supplement: supplementary_material [file attachment]

---

# Appendix

---

## TLDR

Rail-5k is an object detection dataset with images and annotations in Pascal VOC format, with a mission to detect defects and accessories on the rail surface.

The dataset is licensed under CC BY-NC-ND 4.0.

You can access dataset or reproduce all results easily, and our team will keep maintenance in long-term.

## Contents

|          |                                                  |          |
|----------|--------------------------------------------------|----------|
| <b>1</b> | <b>URL of accessing Rail-5k dataset and code</b> | <b>1</b> |
| <b>2</b> | <b>How the data can be read</b>                  | <b>2</b> |
| <b>3</b> | <b>Datasheet documentation(datasheet)</b>        | <b>2</b> |
| 3.1      | Motivation . . . . .                             | 2        |
| 3.2      | Composition . . . . .                            | 2        |
| 3.3      | Collection Process . . . . .                     | 4        |
| 3.4      | Annotation . . . . .                             | 5        |
| 3.5      | Uses . . . . .                                   | 6        |
| 3.6      | Distrubution . . . . .                           | 6        |
| 3.7      | Maintenance . . . . .                            | 7        |
| 3.8      | Impact and Challenges . . . . .                  | 7        |
| <b>4</b> | <b>Author statement</b>                          | <b>7</b> |
| <b>5</b> | <b>Hosting, licensing, and maintenance plan</b>  | <b>7</b> |

## 1 URL of accessing Rail-5k dataset and code

**URL of downloading** All images and annotations.

URL-A: <https://www.dropbox.com/sh/yzq1g3asjz9a1kt/AAC3yNBE4W111SEgfw2vqfpta?dl=0>

URL-B: [https://drive.google.com/drive/folders/1iJmWtjx0i2l\\_iwX48C29e6-\\_0lnnbUUs?usp=sharing](https://drive.google.com/drive/folders/1iJmWtjx0i2l_iwX48C29e6-_0lnnbUUs?usp=sharing)

**URL of Zenodo documentation** <http://doi.org/10.5281/zenodo.4872619>

**URL of reproducing** <https://github.com/TommyZihao/Rail-5k-dataset>

All results are easily reproducible.

## 28 **2 How the data can be read**

- 29 Rail-5k dataset is an object detection dataset in widely used Pascal VOC format.  
30 Each labeled image has an corresponding .xml annotation file with the same file name.  
31 You can visualize image and annotation with common software like labeling or labelme.

## 32 **3 Datasheet documentation(datasheet)**

### 33 **3.1 Motivation**

#### 34 **For what purpose was the dataset created?**

35 Rail surface is prone to rolling fatigue contact, crack, spalling, corrugation, and other defects under  
36 cyclic load from the wheel, which endangers comfort and safety. Traditional inspection methods like  
37 subjective manual observation, sampling checking, are all qualitative or compensating methods, can  
38 not provide a digital and automatic decision-making basis for intelligent maintenance of the whole  
39 line. Recently, computer vision makes it possible to recognize fine-grained damaged objects on rail  
40 surfaces, that is, to distinguish, classify and recognize each damage independently, to realize the  
41 millimeter-level measurement and meter-level localization.

42 Although vision patterns carry abundant quantitative information for rail maintenance, little progress  
43 has been made to recognize and evaluate rail defects due to the lack of high-quality image datasets.  
44 Meanwhile, problems in rail defects also bring new challenges in computer vision.

45 As a consequence, there is still a lack of high-quality image datasets that can drive the training  
46 of high-performance deep learning algorithms. This dataset is created to fill the need of detecting  
47 rail surface defects, to help rail maintenance, save costs, promote comfort and safety of railway  
48 transportation.

#### 49 **What task does this dataset solve?**

50 Object detection and semantic segmentation for rail defects and accessories.

#### 51 **Who created the dataset?**

52 Shanghai Key Laboratory of Rail Infrastructure Durability and System Safety, Tongji University,  
53 Shanghai 201804, China The Key Laboratory of Road and Traffic Engineering, Ministry of Education,  
54 Tongji University, Shanghai 201804, China

#### 55 **Who funded the creation of the dataset?**

56 We would like to acknowledge the support of the National Natural Science Foundation of China  
57 (51678445,51878661) and the Fundamental Research Funds for the Central Universities.

### 58 **3.2 Composition**

#### 59 **What do the instances that comprise the dataset represent?**

60 See Table 1.

#### 61 **How many instances are there in total?**

62 5000+ images and 51 videos. 1100 images are annotated.

#### 63 **Does the dataset contain all possible instances or is it a sample (not necessarily random) of** 64 **instances from a larger set?**

65 The dataset samples typical defects over 10 years covering high-speed railway and subway across  
66 China. It is representative of different kinds of rail defects.

Table 1: Dataset categories statistics

| Class    | Running surface | Contact band | Dark Contact Band | Spalling | Crack | Corrugation | Grinding |
|----------|-----------------|--------------|-------------------|----------|-------|-------------|----------|
| # Boxes  | 1082            | 1093         | 773               | 12582    | 3785  | 3349        | 337      |
| # Images | 1080            | 1087         | 769               | 1005     | 375   | 445         | 179      |
| # Large  | 1082            | 1092         | 773               | 1277     | 2965  | 3329        | 336      |
| # Medium | 0               | 0            | 0                 | 5147     | 784   | 17          | 1        |
| # Small  | 0               | 1            | 0                 | 6148     | 36    | 3           | 0        |

  

| Class    | Fastening | Spike Screw | Set Screw | Indentation | Burning | Welded Joint |
|----------|-----------|-------------|-----------|-------------|---------|--------------|
| # Boxes  | 757       | 502         | 414       | 307         | 41      | 14           |
| # Images | 582       | 424         | 360       | 216         | 10      | 8            |
| # Large  | 750       | 475         | 400       | 4           | 41      | 14           |
| # Medium | 7         | 27          | 14        | 237         | 0       | 0            |
| # Small  | 0         | 0           | 0         | 66          | 0       | 0            |

67 **What data does each instance consist of?**

68 Class and Annotation boxes.

69 **Is there a label or target associated with each instance?**

70 Yes, 1100 images are annotated by ten rail experts through labeling, and were checked by another  
71 two experts.

72 Based on expert knowledge and Chinese railway standards, a series of methods of fine-grained class  
73 definition and instance-level annotation for rail defects object detection are proposed.

74 **Is any information missing from individual instances?**

75 No.

76 **Are relationships between individual instances made explicit (e.g., users' movie ratings, social  
77 network links)?**

78 Yes. There are a lot of **class-translation** situations in the dataset.

79 For example, crack deteriorated into spalling, corrugation gradually form on the contact band.

80 Meanwhile, all defects are on the rail surface and contact band, all components and accessories(like  
81 fasteners and screws) are beyond the rail surface.

82 **Are there recommended data splits (e.g., training, development/validation, testing)?**

83 We randomly split 1,100 labeled images with 4/1 train/test ratio through stratified sampling. The  
84 Rail-5k dataset thus contains 877/223/3000+ train/test/unlabeled images.

85 **Are there any errors, sources of noise, or redundancies in the dataset?**

86 It also contains real-world corrupted images with dark, overexposure, blur, other tools, different lens  
87 distance, category transition, different screws, which are infeasible for non-experts to annotate and  
88 recognize.

89 **Is the dataset self-contained, or does it link to or otherwise rely on external resources (e.g.,  
90 websites, tweets, other datasets)?**

91 No.

92 **Does the dataset contain data that might be considered confidential?**

93 No.

94 **Does the dataset contain data that, if viewed directly, might be offensive, insulting,**  
95 **threatening, or might otherwise cause anxiety?**

96 No.

97 **Does the dataset relate to people?**

98 No.

### 99 3.3 Collection Process

100 **How was the data associated with each instance acquired?**

101 Rail images in the Rail-5k dataset were captured by specialized cameras mounted on inspection cars  
102 riding along the railway, making the lens 200 mm vertically away from the rail surface and focusing  
103 vertically downward. There should be no shadow or overexposure on the rail surface, and the angle  
104 of the auxiliary light is about 30°. See Figure 2.

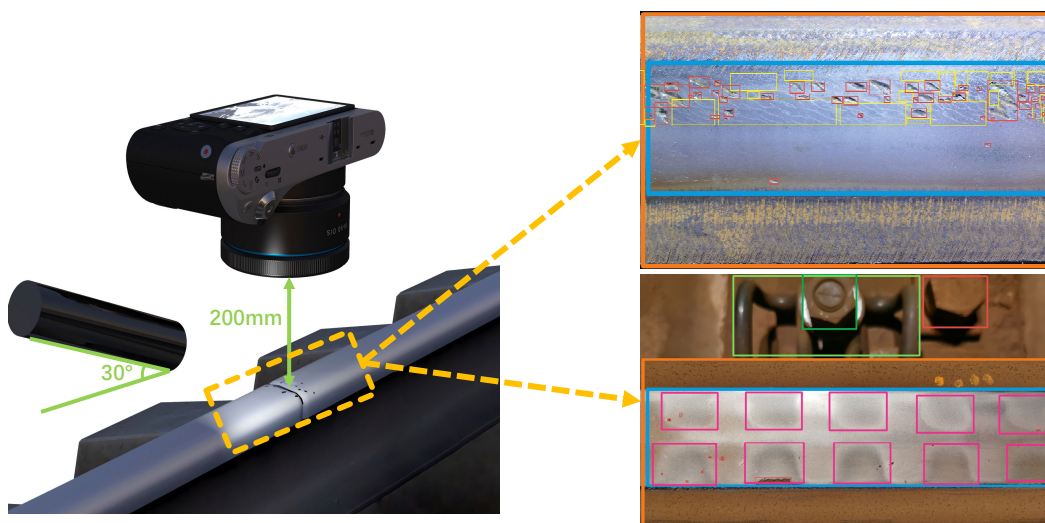

Figure 1: Image capture and annotation

105 The length or width direction of the image is parallel to the longitudinal edge of the rail surface, and  
106 the rail surface should occupy more than 60% of the image.

107 Through the above paradigm, 1100 RGB images (3648 x 2736 pixels) and 41 1080P high-resolution  
108 videos (1920 x 1080 pixels) were captured from sections with typical defects, covering high-speed  
109 railway and subway scenarios such as tunnel, elevated bridge, straight and curve line, inner and outer  
110 rail, before and after grinding or milling. See Table 3. The map shows a typical rail section that we  
111 collect images. Each dot represents an image. See Figure 2.

112 There are also 3000+ rail images but are not collected strictly with above paradigm. Some of them  
113 are corrupted.

114 So the dataset is divided into 2 parts: 1100 images with high quality and 3000+ images containing  
115 corruption. We annotate the first part and leave the second part as test images and semi-supervised  
116 assets.

117 **What mechanisms or procedures were used to collect the data (e.g., hardware apparatus or**  
118 **sensor, manual human curation, software program, software API)?**

119 SLR camera Mobile phone(iPhone XR) Inspection cars riding along the railway pushed by workers  
120 Manual checking.

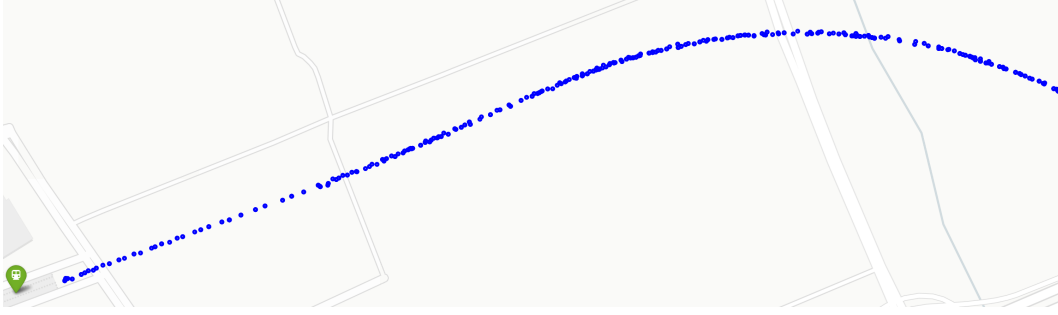

Figure 2: Sampling map

| Location            | Position          | Date       | # Images | # Videos | Device     | Rail Condition(Typical Defects) | Annotation    |
|---------------------|-------------------|------------|----------|----------|------------|---------------------------------|---------------|
| Subway A            | Tunnel            | 2020/11/20 | 246      | 19       | Mate30 Pro | Crack and Spalling              | Annotated     |
| Subway B            | Bridge            | 2020/12/9  | 739      | 22       |            | Corrugation and Spalling        |               |
| Heavy-haul Railway  | Ballasted Rail    | 2008-2019  | 109      | 0        | SLR Camera | Crack and burning               | No annotation |
| Subway A            | Tunnel            | 2019-2020  | 262      | 0        | Xiaomi 9   | Crack and Spalling              |               |
| Subway B            | Bridge and Tunnel | 2019-2020  | 1338     | 0        | iPhone XR  | Corrugation and Spalling        |               |
| Subway C            | Tunnel            | 2021/3/5   | 226      | 10       | Mate30 Pro | New Subway                      |               |
| Subway D            | Bridge            | 2019-2020  | 412      | 0        | iPhone XR  | Before and after grinding       |               |
| Subway E            | Tunnel            | 2020/1/7   | 41       | 0        | Mate9      | Thermal treatment               |               |
| Subway F            | Bridge            | 2020/1/14  | 74       | 0        | Xiaomi 9   | Corrugation                     |               |
| Subway G            | Tunnel            | 2019/6/3   | 18       | 0        | iPhone XR  | Dark Contact Band               |               |
| Highspeed Railway A | Turnout           | 2019/10/16 | 187      | 0        | iPhone X   | 10 months after grinding        |               |
| Highspeed Railway B | Turnout           | 2019/3/11  | 48       | 0        | Mate9      | Crack and Spalling              |               |

Figure 3: Data acquisition

121 **Who was involved in the data collection process (e.g., students, crowdworkers, contractors)**  
 122 **and how were they compensated (e.g., how much were crowdworkers paid)?**

123 Images and videos in Rail-5k dataset are all collected by students and teachers in Tongji University,  
 124 most of the images are collected and annotated by myself(Zihao Zhang).

125 No compensate because we are self-driven volunteers to finish graduate project.

126 **Were any ethical review processes conducted (e.g., by an institutional review board)?**

127 Yes.

### 128 **3.4 Annotation**

129 **Was any preprocessing/cleaning/labeling of the data done?**

130 No preprocessing. No cleaning.

131 1100 images are annotated by ten rail experts through labeling, and were checked by another two  
 132 experts. Based on expert knowledge and Chinese railway standards, a series of methods of fine-  
 133 grained class definition and instance-level annotation for rail defects object detection are proposed.

134 1-Large objects with clear boundary, such as rail surface and contact band. Label the external  
 135 rectangular box as the annotation box, which is the same as common detection datasets.

136 2-Large objects with obscure boundary, such as corrugation. Corrugation usually presents periodic  
 137 and lumpy changes on the rail surface. Label the wave valley as the annotation box.

138 3-Small objects with clear boundary, such as spalling. Label each stripped foreground area no matter  
 139 how small it is.

140 4-Sharp and thin objects with no clear edge boundary, such as crack. Use a number of small and  
 141 dense boxes which only contain crack as annotation, to envelope the whole cracking region. In other  
 142 words, the union region of boxes is exactly the whole cracking region.

143 **Is the software used to preprocess/clean/label the instances available?**

144 Yes, labeling is used to annotate object detection boxes.

### 145 **3.5 Uses**

146 **Has the dataset been used for any tasks already?**

147 No. This is a brand new dataset.

148 **Is there a repository that links to any or all papers or systems that use the dataset?**

149 Not yet.

150 **What (other) tasks could the dataset be used for?**

151 Measure and evaluate defects on the rail surface, such as:

152 Measure cracking area.

153 Measure the wavelength of corrugation.

154 Count spallings in different sizes and measure their areas.

155 Detect the defects and lost of fasteners and screws.

156 **Is there anything about the composition of the dataset or the way it was collected and  
157 preprocessed/cleaned/labeled that might impact future uses?**

158 No.

159 **Are there tasks for which the dataset should not be used?**

160 No. This work helps to detect rail defects and save costs for maintenance. It will never do harm to  
161 society.

### 162 **3.6 Distrubution**

163 **Will the dataset be distributed to third parties outside of the entity (e.g., company, institution,  
164 organization) on behalf of which the dataset was created?**

165 Yes, but with a series of strict terms of use.

166 **How will the dataset will be distributed (e.g., tarball on website, API, GitHub)?**

167 Through email application. We will review and decide whether to send datasets.

168 **Does the dataset have a digital object identifier (DOI)?**

169 Yes, <http://doi.org/10.5281/zenodo.4872619>

170 **When will the dataset be distributed?**

171 From June, 2021.

172 **Will the dataset be distributed under a copyright or other intellectual property (IP) license,  
173 and/or under applicable terms of use (ToU)?**

174 This dataset is licensed under CC BY-NC-ND 4.0 license.

175 **Have any third parties imposed IP-based or other restrictions on the data associated with the  
176 instances?**

177 No.

178 **Do any export controls or other regulatory restrictions apply to the dataset or to individual**  
179 **instances?**

180 Yes, through email application, we will review and decide whether to send datasets.

### 181 **3.7 Maintenance**

182 **Who is supporting/hosting/maintaining the dataset?**

183 Our team will support and maintain the dataset.

184 (Shanghai Key Laboratory of Rail Infrastructure Durability and System Safety, Tongji University)

185 **How can the owner/curator/manager of the dataset be contacted (e.g., email address)?**

186 407431120@qq.com, wqhuo2785@163.com

187 video channel: <https://space.bilibili.com/1900783>

188 **Is there an erratum?**

189 Yes, you can see all versions and update logs at <http://doi.org/10.5281/zenodo.4872619>

190 **Will the dataset be updated (e.g., to correct labeling errors, add new instances, delete**  
191 **instances)?**

192 Yes. Future versions of this dataset will include even more images, segmentation annotations as well  
193 as more channels.

194 **Will older versions of the dataset continue to be supported/hosted/maintained?**

195 Yes. We will give an erratum for old versions.

196 **If others want to extend/augment/build on/contribute to the dataset, is there a mechanism for**  
197 **them to do so?**

198 He can contact us by email and join our team.

199 He can both collect data with us and annotate images with us.

200 His work will be checked and reviewed by our expert team.

### 201 **3.8 Impact and Challenges**

202 This work helps to detect rail defects and save costs for maintenance. It will never do harm to society.

## 203 **4 Author statement**

204 We bear all responsibility in case of violation of rights, etc., and confirmation of the data license CC  
205 BY-NC-ND 4.0. This dataset is only used for non-profit moral purposes and academic research.

## 206 **5 Hosting, licensing, and maintenance plan**

### 207 **Data application**

208 This dataset is created to fill the need of detecting rail surface defects and accessories, to help rail  
209 maintenance, save costs, facilitate comfort and safety of railway transportation.

210 **Data collection**

211 We will get more images incorporating all kinds of railway scenarios including subway, high-speed  
212 railway, heavy-haul rail, trolley track, covering tunnel, bridge, ballasted and ballastless tracks, straight  
213 and curve lines, inner and outer tracks.

214 **Data annotation**

215 We will make more high-quality annotations in the future, including semantic segmentation of  
216 pix-level crack, fine-grained annotation of spike screws and set screws.  
217 We will also propose methods of fine-grained class definition and instance-level annotation.

218 **Data maintenance and distribution**

219 Our team will organize a team consists of rail experts and students from Tongji University to keep the  
220 long-term preservation of the dataset.  
221 Anyone who wants to download any version of Rail-5k may need to submit an application form  
222 through email.  
223 Our team will check and verify each application.  
224 Future version datasets, erratums, as well as papers will be available at  
225 <http://doi.org/10.5281/zenodo.4872619>

226 **Contact Us**

227 The Key Laboratory of Road and Traffic Engineering, Ministry of Education, Tongji University  
228 Shanghai Key Laboratory of Rail Infrastructure Durability and System Safety, Tongji University  
229 Email: 407431120@qq.com, wqhuo2785@163.com  
230 Video channel: <https://space.bilibili.com/1900783>
